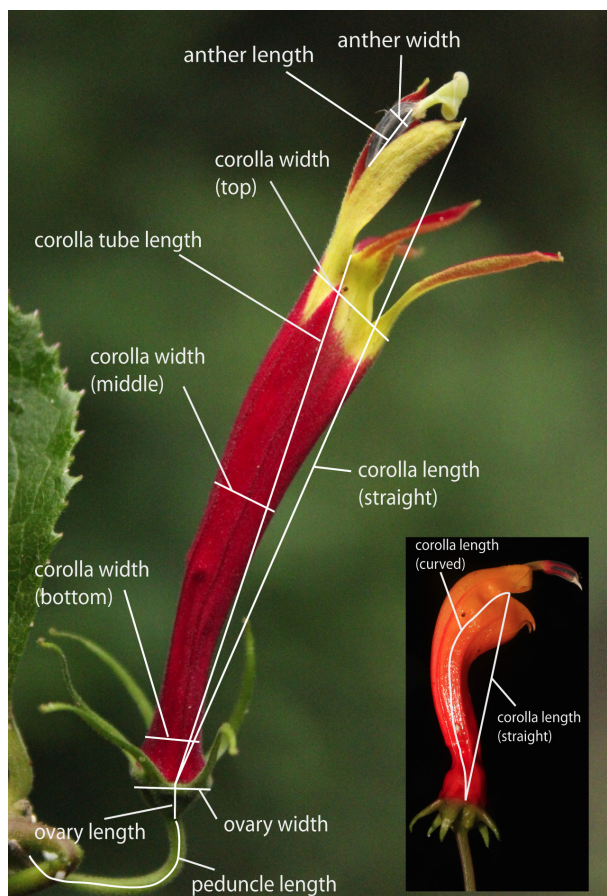

**Figure S2. Depiction of measurements of floral traits taken from herbarium specimens.** Species values for many of these traits are given in Table S1. The remaining traits were combined to provide more informative values (i.e., volumes, areas, and ratios that provide shape information), and these values are presented in Table S1. The combined characters include: ovary length and ovary width (together, ovary volume); anther length and anther width (together, anther area); the three values of corolla width (combined into three separate ratios); and corolla length (curved) (combined with corolla length straight to determine the curvature ratio). Photos are of *Siphocampylus orbignianus* A. DC. and *Centropogon yungasensis* Britton (inset) by L. Lagomarsino.

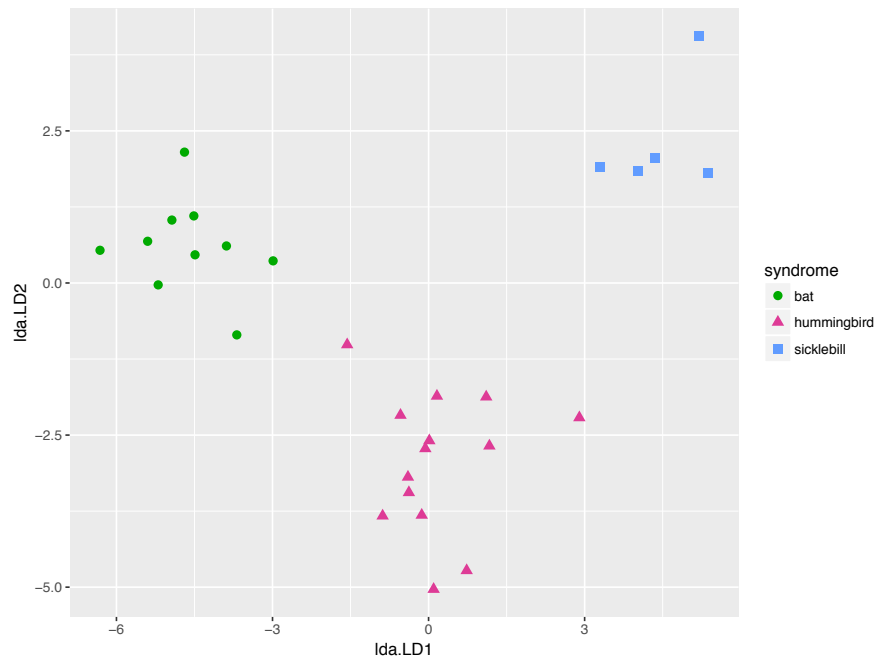

**Figure S3. Distribution of training set for predictive discriminant analysis of centropogonid species based on 11 floral traits.** Each data point represents the placement of a species with a known pollinator into morphological space, which was best defined by two linear functions. The most important traits in the first linear discriminant function (LD1; x-axis) are: corolla curvature (coefficient of linear discriminant: -69.02), corolla flare (2.75), distal inflation (-2.74), basal constriction (-2.38), corolla width (-0.23), and corolla tube length (0.11). The most important traits in the second linear discriminant function (LD2; y-axis) are: corolla curvature (-59.37), distal inflation (-7.26), corolla flare (6.09), basal constriction (-1.40), corolla width (-1.10), and anther area (0.03). These functions were used to predict pollination syndrome based on morphological data (see Table S3). Data points are shaped and colored according to pollination syndrome (bat: green circles; straight-billed hummingbird: pink triangles; sicklebill hummingbird: blue squares).

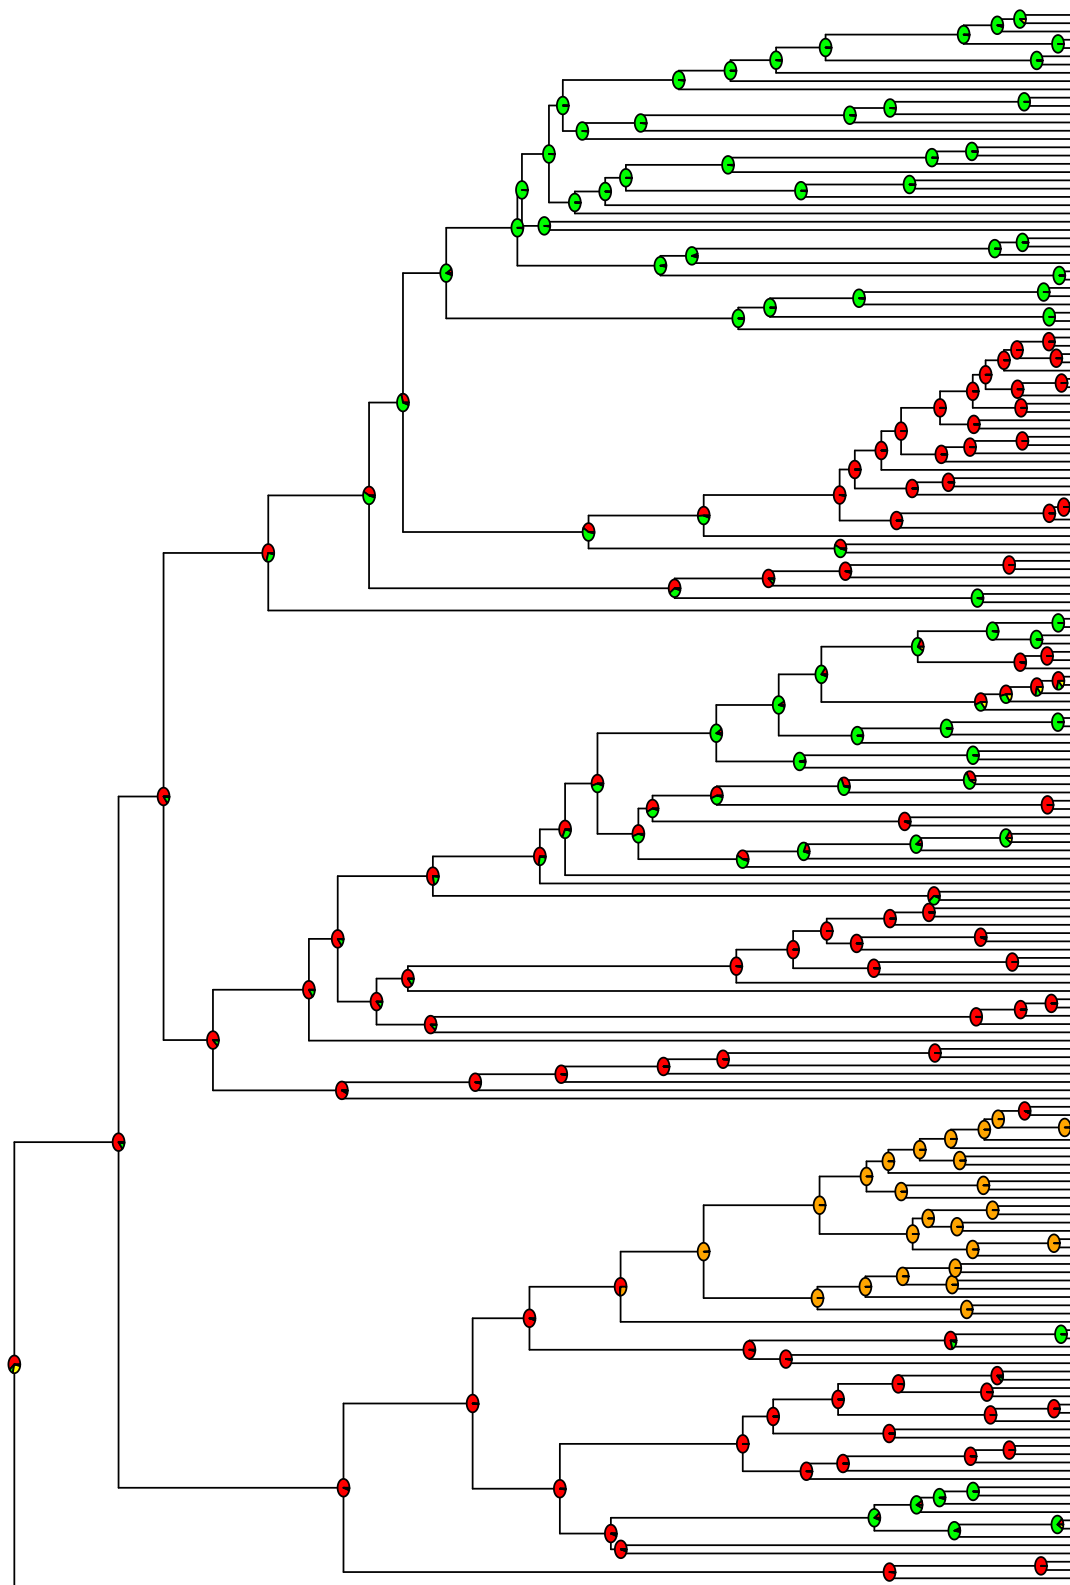

**Figure S4. Maximum likelihood reconstruction of pollination syndromes in the centropogonid clade.** Pie charts at nodes represent ancestral states that were calculated as the marginal likelihood of each pollination syndrome: straight-bill hummingbird (red), bat (green), and sicklebill hummingbird (orange). Inferred number of transitions in the ML ancestral state reconstruction is presented in Table 4. For Bayesian stochastic character mapping see Figure 3 and Table S4.

**Table S1. Trait values of floral characters used in phylogenetic comparative methods for all species sampled.** L= length, measurements in mm; A= area, measurements in mm<sup>2</sup>; Vol, measurements in mm<sup>3</sup>; PC= principal component, values given for the first four principal component axes. A visual representation of these measurements is given in Figure S1.

| Species                          | Syndrome | Color  | Bot: mid | Mid: top | Bot: top | Pedun-cule L (mm) | Corolla L (mm) | Corolla Tube L (mm) | Ovary V (mm <sup>3</sup> ) | Anther A (mm <sup>2</sup> ) | Opening L (mm) | Stamen L (mm) | PC1   | PC2   | PC3   | PC4   |
|----------------------------------|----------|--------|----------|----------|----------|-------------------|----------------|---------------------|----------------------------|-----------------------------|----------------|---------------|-------|-------|-------|-------|
| <i>Burmeistera parviflora</i>    | straight | bright | 1.82     | 0.34     | 0.62     | 25.00             | 9.50           | 3.50                | 12.50                      | 3.00                        | 4.00           | 8.50          | -7.77 | -5.89 | -4.36 | 1.28  |
| <i>Centropogon aequatorialis</i> | straight | bright | 0.73     | 1.09     | 0.80     | 65.50             | 37.20          | 32.00               | 328.56                     | 21.96                       | 6.00           | 45.50         | 0.13  | -0.29 | 2.97  | -1.78 |
| <i>C. argutus</i>                | straight | bright | 0.50     | 0.75     | 0.38     | 20.00             | 45.00          | 37.00               | 500.00                     | 12.00                       | 8.00           | 45.00         | 0.39  | 2.94  | -0.83 | 0.15  |
| <i>C. asclepiadeus</i>           | straight | bright | 0.58     | 0.89     | 0.52     | 23.00             | 34.00          | 30.00               | 320.00                     | 12.00                       | 8.00           | 44.00         | -1.26 | 1.61  | 0.57  | -0.31 |
| <i>C. cf weberbaueri</i>         | straight | bright | 0.62     | 0.81     | 0.50     | 75.00             | 54.00          | 41.00               | 720.00                     | 16.00                       | 4.00           | 48.00         | 2.81  | 1.77  | 0.17  | -0.38 |
| <i>C. coccineus</i>              | straight | bright | 0.40     | 1.34     | 0.54     | 60.00             | 46.00          | 30.00               | 250.00                     | 15.00                       | 7.00           | 41.00         | -0.03 | 2.26  | 4.24  | -0.65 |
| <i>C. comosus</i>                | straight | bright | 0.96     | 0.67     | 0.65     | 37.00             | 47.00          | 35.00               | 864.00                     | 27.00                       | 9.00           | 52.00         | 1.93  | -0.27 | -1.15 | -1.51 |
| <i>C. cordifolius</i>            | straight | bright | 0.46     | 0.87     | 0.40     | 55.00             | 40.00          | 31.00               | 245.00                     | 17.50                       | 8.00           | 43.00         | -0.04 | 2.00  | -0.30 | 0.48  |
| <i>C. cornutus</i>               | straight | bright | 0.65     | 1.04     | 0.67     | 50.00             | 45.00          | 35.00               | 180.00                     | 30.00                       | 12.00          | 65.00         | 2.02  | 1.54  | 1.12  | -2.96 |
| <i>C. costaricae</i>             | straight | bright | 0.32     | 0.94     | 0.30     | 35.00             | 35.00          | 24.00               | 72.00                      | 12.00                       | 3.00           | 25.00         | -2.67 | 2.21  | 1.01  | 2.45  |
| <i>C. erythraeus</i>             | straight | bright | 0.82     | 0.74     | 0.60     | 28.50             | 40.20          | 34.00               | 874.64                     | 15.80                       | 7.00           | 48.00         | 0.51  | 0.45  | -1.35 | -1.36 |
| <i>C. featherstonei</i>          | straight | bright | 0.72     | 0.81     | 0.59     | 50.00             | 34.00          | 25.00               | 245.00                     | 21.00                       | 4.00           | 25.00         | -2.00 | -0.71 | 0.50  | 1.00  |
| <i>C. ferrugineus 1</i>          | straight | bright | 0.38     | 0.63     | 0.23     | 77.00             | 36.00          | 38.50               | 90.75                      | 10.50                       | 7.50           | 44.00         | 0.42  | 2.98  | -1.75 | 1.98  |
| <i>C. ferrugineus 2</i>          | straight | bright | 0.46     | 0.72     | 0.33     | 60.00             | 36.00          | 20.00               | 311.04                     | 14.00                       | 2.00           | 36.00         | -1.36 | 0.92  | -0.71 | 2.53  |
| <i>C. glabrifilis</i>            | straight | bright | 0.40     | 0.77     | 0.31     | 32.00             | 35.00          | 29.00               | 320.00                     | 13.00                       | 6.00           | 43.00         | -0.93 | 2.50  | -0.55 | 1.53  |
| <i>C. grandidentatus</i>         | straight | bright | 0.36     | 0.89     | 0.32     | 32.00             | 32.00          | 27.00               | 245.00                     | 16.00                       | 8.00           | 52.00         | -0.86 | 2.80  | -1.38 | 0.13  |
| <i>C. gutierrezii</i>            | straight | bright | 0.47     | 0.80     | 0.37     | 61.00             | 60.00          | 42.50               | 1024.00                    | 19.80                       | 8.50           | 65.00         | 4.69  | 3.31  | -0.39 | -0.54 |

|                          |          |        |      |      |      |        |       |       |             |       |       |       |       |       |       |       |
|--------------------------|----------|--------|------|------|------|--------|-------|-------|-------------|-------|-------|-------|-------|-------|-------|-------|
| <i>C. incanus (pink)</i> | straight | bright | 1.00 | 0.90 | 0.90 | 77.00  | 42.00 | 22.00 | 1635.9<br>3 | 55.00 | 15.00 | 42.00 | 2.47  | -4.52 | 1.77  | -0.32 |
| <i>C. leucocarpus</i>    | straight | bright | 0.53 | 0.75 | 0.40 | 30.00  | 37.00 | 25.00 | 100.00      | 10.00 | 3.00  | 31.00 | -2.21 | 1.46  | -0.52 | 1.40  |
| <i>C. llanganatensis</i> | straight | bright | 0.48 | 0.70 | 0.34 | 49.50  | 19.50 | 14.50 | 81.65       | 5.95  | 7.00  | 25.00 | -4.39 | 0.19  | -0.67 | 3.46  |
| <i>C. luteus</i>         | straight | bright | 0.59 | 0.69 | 0.41 | 59.00  | 42.00 | 36.00 | 600.00      | 12.00 | 7.00  | 46.00 | 0.96  | 1.73  | -0.98 | 0.67  |
| <i>C. luteynii</i>       | straight | bright | 0.57 | 0.76 | 0.43 | 50.00  | 36.00 | 26.00 | 125.00      | 10.00 | 3.00  | 30.00 | -1.92 | 0.93  | -0.23 | 1.49  |
| <i>C. macbridei</i>      | straight | bright | 0.53 | 0.78 | 0.41 | 74.00  | 54.00 | 41.50 | 661.25      | 34.00 | 7.00  | 54.50 | 3.92  | 1.99  | -0.13 | 0.17  |
| <i>C. magnificus</i>     | straight | bright | 0.79 | 0.83 | 0.66 | 128.00 | 44.00 | 30.00 | 1611.5      | 81.25 | 11.50 | 60.00 | 6.33  | -3.51 | 1.28  | 1.24  |
| <i>C. mandonis 1</i>     | straight | bright | 0.76 | 0.81 | 0.62 | 183.00 | 44.40 | 28.00 | 2704.5      | 58.50 | 11.50 | 57.00 | 7.34  | -4.42 | 1.30  | 2.89  |
| <i>C. mandonis 2</i>     | straight | bright | 1.00 | 0.78 | 0.78 | 151.00 | 51.00 | 32.00 | 1454.8      | 70.00 | 12.00 | 65.88 | 7.10  | -3.93 | 0.93  | -0.24 |
| <i>C. minimus</i>        | straight | bright | 0.43 | 0.94 | 0.40 | 14.50  | 13.90 | 12.31 | 29.40       | 3.92  | 3.30  | 13.20 | -6.57 | 0.34  | 1.14  | 3.12  |
| <i>C. nervosus</i>       | straight | bright | 0.33 | 1.00 | 0.33 | 70.00  | 57.00 | 35.00 | 180.00      | 30.00 | 7.00  | 54.00 | 2.90  | 3.28  | 1.45  | 0.36  |
| <i>C. palmanus</i>       | straight | bright | 0.65 | 0.69 | 0.45 | 65.00  | 35.00 | 25.00 | 137.50      | 8.75  | 6.50  | 30.50 | -1.79 | 0.31  | -0.70 | 1.66  |
| <i>C. pichinchensis</i>  | straight | bright | 0.67 | 1.19 | 0.80 | 62.50  | 30.50 | 27.50 | 650.25      | 15.75 | 6.00  | 29.00 | -1.69 | -0.98 | 3.64  | -0.63 |
| <i>C. preslii</i>        | straight | bright | 0.38 | 0.77 | 0.30 | 104.00 | 37.00 | 32.00 | 700.00      | 14.00 | 8.00  | 49.00 | 1.46  | 1.73  | -1.49 | 1.68  |
| <i>C. reticulatus</i>    | straight | bright | 0.56 | 0.61 | 0.34 | 75.00  | 49.00 | 34.00 | 576.00      | 24.00 | 8.00  | 50.00 | 2.41  | 1.54  | -1.61 | 1.34  |
| <i>C. salviiformis</i>   | straight | bright | 0.60 | 0.73 | 0.43 | 50.20  | 26.00 | 22.50 | 356.40      | 12.94 | 4.50  | 26.00 | -2.80 | -0.10 | -0.65 | 2.23  |
| <i>C. sodiroanus</i>     | straight | bright | 0.48 | 0.72 | 0.34 | 41.00  | 49.00 | 47.00 | 324.00      | 10.00 | 6.00  | 52.00 | 1.95  | 4.01  | -1.04 | -0.41 |
| <i>C. solanifolius</i>   | straight | bright | 0.55 | 0.71 | 0.39 | 21.50  | 47.00 | 40.00 | 433.50      | 40.00 | 14.00 | 54.00 | 2.28  | 2.41  | -2.25 | -0.78 |
| <i>C. solanifolius</i>   | straight | bright | 0.64 | 0.65 | 0.41 | 35.00  | 38.00 | 30.00 | 256.00      | 19.60 | 17.00 | 46.00 | -0.31 | 1.39  | -2.75 | -0.11 |
| <i>C. sp.</i>            | straight | bright | 0.55 | 0.73 | 0.40 | 57.00  | 34.20 | 29.00 | 786.50      | 14.40 | 8.00  | 43.00 | -0.05 | 0.93  | -0.57 | 1.58  |
| <i>C. subandinus</i>     | straight | bright | 0.70 | 0.65 | 0.45 | 143.00 | 54.00 | 42.50 | 729.00      | 35.00 | 10.00 | 61.00 | 5.75  | 0.41  | -0.76 | 0.63  |
| <i>C. talamancensis</i>  | straight | bright | 0.71 | 0.76 | 0.54 | 70.50  | 74.00 | 49.00 | 1378.1<br>3 | 31.90 | 5.00  | 64.50 | 7.08  | 2.02  | -0.46 | -1.91 |
| <i>C. tesmannii</i>      | straight | bright | 0.50 | 0.57 | 0.29 | 16.00  | 48.00 | 42.00 | 324.00      | 12.00 | 7.00  | 48.00 | 1.01  | 3.77  | -2.45 | 0.25  |
| <i>C. trichoides</i>     | straight | bright | 0.45 | 0.86 | 0.39 | 56.00  | 32.75 | 29.00 | 158.40      | 17.92 | 6.70  | 46.00 | -0.63 | 1.85  | -1.02 | 0.32  |
| <i>C. unduavensis</i>    | straight | bright | 0.56 | 0.83 | 0.46 | 59.00  | 30.00 | 23.00 | 814.31      | 21.45 | 11.00 | 43.50 | -0.48 | -0.01 | 0.33  | 1.68  |
| <i>C. valerii</i>        | straight | bright | 0.41 | 0.81 | 0.33 | 69.00  | 27.00 | 23.00 | 245.00      | 13.20 | 8.00  | 37.00 | -1.74 | 1.11  | 0.17  | 2.72  |
| <i>C. weberbaueri</i>    | straight | bright | 0.69 | 0.87 | 0.60 | 45.00  | 36.50 | 29.50 | 496.38      | 13.00 | 4.00  | 35.00 | -1.07 | 0.24  | 0.73  | 0.01  |

|                              |          |        |      |      |      |        |       |       |        |       |       |       |       |       |       |       |
|------------------------------|----------|--------|------|------|------|--------|-------|-------|--------|-------|-------|-------|-------|-------|-------|-------|
| <i>C. yarumalensis</i>       | straight | bright | 0.53 | 0.88 | 0.47 | 36.00  | 36.00 | 30.00 | 405.00 | 17.25 | 7.00  | 45.00 | -0.51 | 1.59  | 0.12  | 0.04  |
| <i>Siphocampylus andinus</i> | straight | bright | 0.46 | 0.80 | 0.37 | 47.00  | 52.05 | 39.50 | 64.00  | 15.40 | 7.00  | 55.00 | 1.85  | 3.65  | -0.33 | -0.49 |
| <i>S. angustiflorus</i>      | straight | bright | 0.40 | 0.75 | 0.30 | 7.00   | 32.00 | 20.00 | 24.00  | 15.00 | 6.00  | 23.00 | -3.65 | 1.67  | -0.64 | 2.65  |
| <i>S. antioquianus</i>       | straight | bright | 0.27 | 0.92 | 0.25 | 108.00 | 52.00 | 43.00 | 900.00 | 30.40 | 13.00 | 58.00 | 4.85  | 3.08  | 0.97  | 1.62  |
| <i>S. aureus</i>             | straight | bright | 0.44 | 0.74 | 0.32 | 53.25  | 53.00 | 42.50 | 67.20  | 6.75  | 7.50  | 51.50 | 1.75  | 4.12  | -0.85 | -0.16 |
| <i>S. betulaeifolius</i>     | straight | bright | 0.45 | 0.98 | 0.45 | 46.00  | 46.00 | 40.00 | 36.00  | 12.00 | 5.00  | 46.00 | 0.57  | 3.33  | 1.19  | -0.73 |
| <i>S. bilabiatus</i>         | straight | bright | 0.84 | 0.68 | 0.58 | 65.00  | 58.00 | 32.00 | 405.00 | 27.00 | 8.00  | 58.00 | 3.00  | 0.54  | -0.98 | -1.32 |
| <i>S. boliviensis</i>        | straight | bright | 0.47 | 0.84 | 0.39 | 79.00  | 50.00 | 40.00 | 180.00 | 16.00 | 2.00  | 39.00 | 1.46  | 2.48  | 0.44  | 0.75  |
| <i>S. brevicalyx</i>         | straight | bright | 0.38 | 0.73 | 0.28 | 80.00  | 60.00 | 52.00 | 108.00 | 18.00 | 9.00  | 70.00 | 5.04  | 5.13  | -0.89 | -0.81 |
| <i>S. citrinus</i>           | straight | bright | 0.45 | 1.04 | 0.47 | 29.00  | 38.00 | 20.50 | 256.00 | 12.00 | 6.00  | 40.50 | -1.81 | 1.67  | 1.80  | 0.51  |
| <i>S. clotho</i>             | straight | bright | 0.57 | 0.60 | 0.34 | 40.00  | 67.00 | 37.00 | 98.00  | 27.00 | 5.00  | 55.00 | 3.26  | 3.15  | -2.03 | -0.44 |
| <i>S. convolvulaceus</i>     | straight | bright | 0.36 | 0.95 | 0.34 | 100.00 | 48.00 | 40.00 | 144.00 | 21.00 | 7.80  | 40.00 | 1.89  | 2.62  | 1.43  | 1.40  |
| <i>S. correoides</i>         | straight | bright | 1.25 | 0.80 | 1.00 | 25.00  | 28.00 | 14.00 | 190.13 | 10.00 | 4.00  | 33.00 | -3.94 | -3.62 | 0.52  | -2.34 |
| <i>S. corymbiferus</i>       | straight | bright | 0.39 | 0.87 | 0.34 | 45.00  | 44.00 | 32.00 | 75.00  | 14.00 | 4.50  | 49.00 | 0.27  | 3.17  | 0.29  | 0.54  |
| <i>S. corymbiferus</i>       | straight | bright | 0.63 | 1.00 | 0.63 | 37.00  | 41.00 | 30.00 | 88.00  | 8.25  | 6.00  | 39.62 | -1.24 | 1.39  | 1.71  | -1.09 |
| <i>S. dependens</i>          | straight | bright | 0.73 | 0.62 | 0.45 | 75.00  | 47.00 | 30.00 | 567.00 | 21.00 | 6.00  | 48.00 | 1.64  | 0.42  | -1.67 | 0.67  |
| <i>S. elfredii</i>           | straight | bright | 0.74 | 1.00 | 0.74 | 45.00  | 45.00 | 30.00 | 384.00 | 24.00 | 7.00  | 43.00 | 0.27  | -0.01 | 1.98  | -1.60 |
| <i>S. fiebrigii</i>          | straight | bright | 0.36 | 1.04 | 0.38 | 62.00  | 47.00 | 40.00 | 125.00 | 12.00 | 6.00  | 49.00 | 1.24  | 3.74  | 1.72  | -0.13 |
| <i>S. flagelliformis</i>     | straight | bright | 0.57 | 0.91 | 0.52 | 19.00  | 30.00 | 21.00 | 55.69  | 11.00 | 4.50  | 36.00 | -3.06 | 0.98  | 0.81  | 0.44  |
| <i>S. fulgens</i>            | straight | bright | 0.42 | 1.19 | 0.50 | 37.00  | 44.00 | 35.00 | 200.00 | 10.00 | 8.00  | 47.00 | -0.04 | 3.19  | 2.90  | -1.06 |
| <i>S. krauseanus</i>         | straight | bright | 0.46 | 0.96 | 0.44 | 25.00  | 31.00 | 21.00 | 45.38  | 24.00 | 6.00  | 33.00 | -2.54 | 1.02  | 1.31  | 1.34  |
| <i>S. longipedunculatus</i>  | straight | bright | 0.60 | 0.77 | 0.46 | 80.00  | 53.00 | 40.00 | 700.00 | 24.00 | 4.00  | 51.00 | 3.26  | 1.58  | -0.16 | 0.05  |
| <i>S. lycioides</i>          | straight | bright | 0.57 | 1.00 | 0.57 | 66.00  | 35.00 | 25.00 | 182.25 | 8.00  | 7.00  | 34.00 | -1.73 | 0.54  | 1.95  | 0.50  |
| <i>S. macropodus</i>         | straight | bright | 0.38 | 0.93 | 0.36 | 45.00  | 55.00 | 49.00 | 108.00 | 17.50 | 4.00  | 49.00 | 2.39  | 4.57  | 0.28  | -0.97 |
| <i>S. nematosepalus</i>      | straight | bright | 0.45 | 0.61 | 0.28 | 35.00  | 51.00 | 38.00 | 144.00 | 28.00 | 3.00  | 55.00 | 2.16  | 3.34  | -1.94 | 0.51  |
| <i>S. nemoralis</i>          | straight | bright | 0.79 | 1.00 | 0.79 | 22.00  | 22.00 | 10.00 | 84.61  | 4.20  | 3.50  | 19.50 | -5.79 | -1.92 | 2.13  | 0.10  |
| <i>S. nitidus</i>            | straight | bright | 0.68 | 0.74 | 0.50 | 26.00  | 43.00 | 35.00 | 90.75  | 19.60 | 6.00  | 49.00 | 0.23  | 1.86  | -0.70 | -0.90 |

|                           |          |        |      |      |      |        |       |       |        |       |       |       |       |        |       |       |
|---------------------------|----------|--------|------|------|------|--------|-------|-------|--------|-------|-------|-------|-------|--------|-------|-------|
| <i>S. oblongifolius</i>   | straight | bright | 0.58 | 0.86 | 0.50 | 23.00  | 39.00 | 28.00 | 56.00  | 15.00 | 3.50  | 44.00 | -1.16 | 1.75   | 0.32  | -0.32 |
| <i>S. orbignianus</i>     | straight | bright | 0.68 | 0.90 | 0.61 | 30.00  | 41.00 | 31.00 | 108.00 | 15.00 | 7.00  | 54.81 | -0.06 | 1.57   | 0.69  | -1.77 |
| <i>S. pubescens</i>       | straight | bright | 0.31 | 0.93 | 0.29 | 39.00  | 39.00 | 30.00 | 364.50 | 14.00 | 9.00  | 42.00 | -0.49 | 3.02   | 0.20  | 1.24  |
| <i>S. rosmarinifolius</i> | straight | bright | 0.44 | 1.24 | 0.55 | 40.00  | 36.00 | 22.50 | 73.94  | 13.00 | 4.00  | 32.00 | -2.42 | 1.38   | 3.63  | 0.24  |
| <i>S. scandens</i>        | straight | bright | 0.48 | 0.78 | 0.37 | 10.00  | 39.00 | 30.00 | 101.53 | 10.50 | 5.00  | 45.00 | -1.21 | 2.89   | -0.64 | 0.26  |
| <i>S. sceptrum</i>        | straight | bright | 0.79 | 1.21 | 0.96 | 45.50  | 41.20 | 18.00 | 130.93 | 13.64 | 5.90  | 40.00 | -1.88 | -1.23  | 4.06  | -2.62 |
| <i>S. sp.</i>             | straight | bright | 0.83 | 1.27 | 1.05 | 55.00  | 41.00 | 39.00 | 320.00 | 24.00 | 7.00  | 44.00 | 0.48  | -0.61  | 4.75  | -4.00 |
| <i>S. antonellii</i>      | straight | bright | 0.82 | 0.61 | 0.50 | 40.00  | 45.00 | 31.00 | 225.00 | 12.00 | 9.00  | 45.00 | 0.00  | 0.94   | -1.75 | -0.41 |
| <i>S. siberiensis</i>     | straight | bright | 1.00 | 0.75 | 0.75 | 84.00  | 37.00 | 22.00 | 128.00 | 12.75 | 9.00  | 38.00 | -1.13 | -2.00  | 0.18  | -0.56 |
| <i>S. sparsipilus</i>     | straight | bright | 0.40 | 0.92 | 0.37 | 15.00  | 46.00 | 30.00 | 294.00 | 27.00 | 5.50  | 51.77 | 0.61  | 2.95   | 0.50  | 0.09  |
| <i>S. tupaeformis</i>     | straight | bright | 0.67 | 1.00 | 0.67 | 25.00  | 35.00 | 22.00 | 320.00 | 21.00 | 4.50  | 40.00 | -1.72 | -0.02  | 1.79  | -0.63 |
| <i>S. virgatus</i>        | straight | bright | 0.34 | 1.31 | 0.44 | 40.00  | 30.00 | 19.00 | 32.00  | 6.00  | 3.00  | 26.00 | -3.77 | 1.80   | 4.07  | 1.32  |
| <i>S. werdermannii</i>    | straight | bright | 0.47 | 1.06 | 0.50 | 85.00  | 41.00 | 22.63 | 81.00  | 12.00 | 9.00  | 42.00 | -0.54 | 1.08   | 2.39  | 0.74  |
| <i>S. westinianus</i>     | straight | bright | 0.48 | 0.86 | 0.41 | 40.00  | 41.00 | 30.00 | 108.00 | 24.00 | 5.00  | 32.00 | -0.82 | 1.60   | 0.49  | 1.26  |
| <i>B. almedae</i>         | bat      | dull   | 1.73 | 0.43 | 0.75 | 30.00  | 37.00 | 14.00 | 180.00 | 18.00 | 9.70  | 40.00 | -2.30 | -4.18  | -3.89 | -2.08 |
| <i>B. ceratocarpa</i>     | bat      | dull   | 1.52 | 0.58 | 0.88 | 43.00  | 25.00 | 9.00  | 144.00 | 24.00 | 13.00 | 34.00 | -3.54 | -5.22  | -1.52 | -1.13 |
| <i>B. chiriquiensis</i>   | bat      | dull   | 1.50 | 0.27 | 0.40 | 100.00 | 28.00 | 12.00 | 324.00 | 24.00 | 12.50 | 25.00 | -2.09 | -4.68  | -4.60 | 2.99  |
| <i>B. crebra</i>          | bat      | dull   | 1.67 | 0.26 | 0.43 | 65.00  | 26.00 | 14.00 | 52.94  | 22.61 | 10.50 | 29.00 | -2.89 | -4.25  | -5.12 | 1.55  |
| <i>B. cyclostigmata</i>   | bat      | dull   | 2.75 | 0.50 | 1.38 | 35.00  | 33.00 | 7.00  | 216.00 | 20.00 | 10.00 | 35.00 | -3.68 | -10.08 | -2.57 | -6.23 |
| <i>B. dendrophila</i>     | bat      | dull   | 2.14 | 0.30 | 0.64 | 51.00  | 32.00 | 18.00 | 225.00 | 29.25 | 12.00 | 52.00 | -0.81 | -5.19  | -5.23 | -2.11 |
| <i>B. domingensis</i>     | bat      | dull   | 1.20 | 0.49 | 0.58 | 37.00  | 20.00 | 20.00 | 94.30  | 17.94 | 9.00  | 24.50 | -3.90 | -2.73  | -2.55 | 0.98  |
| <i>B. mcvaughii</i>       | bat      | dull   | 1.83 | 0.38 | 0.70 | 70.00  | 25.00 | 8.00  | 96.00  | 21.00 | 11.00 | 21.00 | -3.98 | -6.31  | -3.55 | 0.51  |
| <i>B. microphylla</i>     | bat      | dull   | 2.02 | 0.35 | 0.71 | 30.00  | 7.00  | 15.00 | 48.00  | 12.00 | 7.00  | 22.00 | -5.97 | -5.97  | -4.33 | -0.54 |
| <i>B. morii</i>           | bat      | dull   | 2.46 | 0.30 | 0.74 | 37.00  | 20.00 | 11.00 | 100.00 | 15.00 | 7.00  | 21.00 | -5.11 | -7.43  | -5.21 | -1.44 |
| <i>B. obtusifolia</i>     | bat      | dull   | 2.90 | 0.31 | 0.89 | 43.00  | 35.00 | 15.00 | 441.00 | 24.50 | 11.50 | 32.00 | -2.37 | -8.73  | -5.44 | -3.85 |
| <i>B. racemiflora</i>     | bat      | dull   | 1.00 | 0.48 | 0.48 | 48.40  | 34.00 | 21.20 | 168.54 | 28.70 | 12.00 | 39.00 | -1.09 | -1.45  | -2.68 | 1.07  |
| <i>B. refracta</i>        | bat      | dull   | 2.58 | 0.30 | 0.77 | 45.00  | 25.00 | 9.00  | 252.00 | 42.00 | 16.00 | 38.00 | -2.53 | -8.43  | -5.29 | -2.06 |



|                        |     |      |      |      |      |        |       |       |         |        |       |       |       |        |       |       |
|------------------------|-----|------|------|------|------|--------|-------|-------|---------|--------|-------|-------|-------|--------|-------|-------|
| <i>B. sodiroana</i>    | bat | dull | 2.52 | 0.42 | 1.05 | 66.00  | 32.00 | 18.00 | 250.00  | 24.00  | 11.00 | 40.00 | -1.74 | -8.07  | -3.54 | -4.29 |
| <i>B. sp.</i>          | bat | dull | 2.58 | 0.28 | 0.73 | 14.00  | 20.00 | 11.00 | 392.00  | 12.00  | 11.50 | 24.50 | -5.15 | -7.41  | -5.78 | -2.03 |
| <i>B. succulenta</i>   | bat | dull | 1.52 | 0.53 | 0.80 | 98.00  | 35.00 | 14.00 | 162.00  | 33.00  | 15.00 | 41.00 | -0.60 | -5.23  | -1.77 | -0.55 |
| <i>B. tenuiflora</i>   | bat | dull | 1.60 | 0.59 | 0.94 | 85.00  | 24.00 | 14.50 | 192.00  | 24.00  | 10.00 | 31.00 | -2.66 | -6.06  | -1.05 | -1.02 |
| <i>B. toroensis</i>    | bat | dull | 1.27 | 0.55 | 0.69 | 93.00  | 28.00 | 16.00 | 275.00  | 30.00  | 15.00 | 35.00 | -1.35 | -4.31  | -1.56 | 0.82  |
| <i>B. truncata</i>     | bat | dull | 1.66 | 0.40 | 0.67 | 80.00  | 45.00 | 20.00 | 145.00  | 66.00  | 10.00 | 37.00 | 1.35  | -5.45  | -3.17 | -0.06 |
| <i>B. utleyi</i>       | bat | dull | 1.72 | 0.40 | 0.68 | 100.00 | 28.00 | 10.00 | 150.00  | 28.00  | 8.00  | 29.00 | -2.24 | -6.18  | -3.18 | 0.80  |
| <i>B. variabilis</i>   | bat | dull | 1.33 | 0.32 | 0.42 | 44.00  | 31.50 | 22.00 | 151.25  | 28.00  | 12.00 | 35.50 | -1.54 | -2.31  | -4.49 | 1.10  |
| <i>B. vulgaris</i>     | bat | dull | 2.29 | 0.41 | 0.94 | 125.00 | 25.00 | 15.00 | 432.00  | 60.00  | 14.00 | 4.10  | -1.87 | -10.78 | -2.45 | 0.64  |
| <i>B. zurquiensis</i>  | bat | dull | 2.15 | 0.25 | 0.53 | 25.00  | 33.00 | 19.00 | 294.00  | 15.00  | 5.00  | 35.00 | -2.57 | -4.51  | -6.06 | -1.32 |
| <i>C. brittonianus</i> | bat | dull | 1.00 | 1.00 | 1.00 | 124.00 | 33.42 | 21.00 | 1859.00 | 90.00  | 18.00 | 59.88 | 5.17  | -6.53  | 3.23  | -0.13 |
| <i>C. diana</i>        | bat | dull | 0.81 | 0.75 | 0.61 | 85.00  | 60.00 | 45.00 | 2880.00 | 45.00  | 8.00  | 54.00 | 7.42  | -1.32  | -0.19 | 0.14  |
| <i>C. dombeyanus</i>   | bat | dull | 0.83 | 0.75 | 0.63 | 147.50 | 50.50 | 24.00 | 3364.00 | 94.50  | 9.00  | 46.50 | 8.36  | -6.31  | 0.82  | 3.88  |
| <i>C. eilserii</i>     | bat | dull | 0.90 | 0.53 | 0.47 | 150.00 | 62.00 | 45.00 | 2343.75 | 119.00 | 23.00 | 63.00 | 11.75 | -3.94  | -1.36 | 2.48  |
| <i>C. incanus</i>      | bat | dull | 1.00 | 0.95 | 0.95 | 153.00 | 50.00 | 27.00 | 1936.00 | 78.00  | 19.00 | 59.00 | 6.98  | -5.62  | 2.78  | -0.27 |
| <i>C. isabellinus</i>  | bat | dull | 1.08 | 0.48 | 0.51 | 150.00 | 65.00 | 30.00 | 4725.00 | 96.00  | 15.00 | 50.00 | 11.75 | -7.03  | -2.02 | 4.43  |
| <i>C. macrocarpus</i>  | bat | dull | 1.71 | 0.39 | 0.66 | 164.00 | 27.00 | 11.50 | 1470.33 | 48.00  | 13.50 | 33.00 | 1.36  | -8.48  | -2.75 | 2.84  |
| <i>C. perlongus</i>    | bat | dull | 1.12 | 0.53 | 0.59 | 135.00 | 75.00 | 38.00 | 3920.00 | 68.00  | 17.00 | 75.00 | 12.28 | -3.97  | -2.04 | 0.63  |
| <i>C. peruvianus</i>   | bat | dull | 1.00 | 0.80 | 0.80 | 110.00 | 29.00 | 14.00 | 2704.00 | 55.00  | 18.00 | 42.00 | 2.74  | -6.49  | 1.05  | 2.31  |
| <i>C. rex</i>          | bat | dull | 1.66 | 0.44 | 0.72 | 139.00 | 49.00 | 25.00 | 1089.00 | 63.00  | 18.00 | 52.00 | 4.80  | -6.16  | -2.55 | -0.11 |
| <i>C. simulans</i>     | bat | dull | 1.00 | 0.59 | 0.59 | 120.00 | 38.00 | 11.00 | 3600.00 | 75.00  | 10.00 | 44.00 | 5.40  | -7.30  | -1.25 | 4.36  |
| <i>C. smithii</i>      | bat | dull | 1.22 | 0.55 | 0.67 | 200.00 | 43.00 | 20.00 | 3757.00 | 120.00 | 21.00 | 56.00 | 10.43 | -9.85  | -0.51 | 4.66  |
| <i>C. sp.</i>          | bat | dull | 1.02 | 0.55 | 0.56 | 160.00 | 43.00 | 23.00 | 3375.00 | 112.50 | 7.00  | 45.00 | 8.65  | -7.94  | -0.82 | 5.05  |

|                        |            |        |      |      |      |        |       |       |         |       |       |       |       |       |       |       |
|------------------------|------------|--------|------|------|------|--------|-------|-------|---------|-------|-------|-------|-------|-------|-------|-------|
| <i>C. viridiflorus</i> | bat        | dull   | 1.00 | 0.81 | 0.81 | 85.00  | 60.00 | 25.00 | 2535.00 | 55.00 | 8.00  | 45.00 | 5.39  | -4.24 | 0.72  | 0.14  |
| <i>S. actinothrix</i>  | bat        | dull   | 1.00 | 1.00 | 1.00 | 75.00  | 30.00 | 11.00 | 108.00  | 40.00 | 5.00  | 40.00 | -1.64 | -4.30 | 2.84  | -1.23 |
| <i>S. affrictus</i>    | bat        | dull   | 1.00 | 0.87 | 0.87 | 120.00 | 51.00 | 21.00 | 891.00  | 36.90 | 15.00 | 40.00 | 2.28  | -3.80 | 1.69  | -0.37 |
| <i>S. affinis</i>      | bat        | dull   | 0.55 | 0.79 | 0.44 | 85.00  | 28.00 | 22.00 | 405.00  | 24.00 | 6.00  | 12.00 | -2.42 | -1.26 | 0.61  | 3.80  |
| <i>S. ayersiae</i>     | bat        | dull   | 1.27 | 1.00 | 1.27 | 30.50  | 20.58 | 8.00  | 222.35  | 17.85 | 5.60  | 39.25 | -4.31 | -5.27 | 2.78  | -3.62 |
| <i>S. chloroleucus</i> | bat        | dull   | 0.64 | 0.69 | 0.44 | 10.70  | 23.50 | 12.50 | 44.55   | 16.32 | 7.75  | 28.50 | -4.42 | -0.28 | -0.96 | 2.02  |
| <i>S. corynoides</i>   | bat        | dull   | 1.24 | 1.14 | 1.42 | 110.00 | 35.00 | 30.00 | 1296.00 | 60.00 | 10.60 | 17.00 | 1.04  | -7.71 | 5.28  | -2.26 |
| <i>S. giganteus</i>    | bat        | dull   | 0.87 | 0.75 | 0.66 | 115.00 | 77.00 | 40.00 | 4000.00 | 80.00 | 10.00 | 57.00 | 11.61 | -3.83 | 0.16  | 1.17  |
| <i>S. jelksii</i>      | bat        | dull   | 0.88 | 0.73 | 0.64 | 160.00 | 53.00 | 22.00 | 1573.00 | 80.00 | 7.00  | 36.00 | 5.56  | -5.27 | 0.79  | 3.18  |
| <i>S. matthiaei</i>    | bat        | dull   | 0.57 | 0.54 | 0.31 | 120.00 | 37.50 | 21.00 | 180.50  | 56.00 | 7.00  | 34.50 | 1.39  | -1.61 | -1.38 | 4.40  |
| <i>S. obovatus</i>     | bat        | dull   | 1.20 | 0.78 | 0.94 | 12.20  | 17.50 | 9.50  | 130.70  | 18.00 | 5.00  | 36.50 | -4.78 | -3.81 | 0.28  | -1.65 |
| <i>S. rusbyanus</i>    | bat        | dull   | 0.85 | 0.76 | 0.65 | 90.00  | 42.00 | 12.00 | 175.00  | 18.00 | 7.00  | 28.00 | -1.60 | -2.36 | 0.38  | 1.30  |
| <i>S. smilax</i>       | bat        | dull   | 1.54 | 0.40 | 0.62 | 23.00  | 28.50 | 16.97 | 303.07  | 28.88 | 11.75 | 33.94 | -2.56 | -3.82 | -3.73 | -0.22 |
| <i>S. tunarensis</i>   | bat        | dull   | 1.44 | 0.83 | 1.20 | 129.00 | 28.00 | 15.00 | 700.00  | 32.00 | 8.00  | 41.50 | -0.23 | -7.12 | 1.91  | -1.92 |
| <i>S. umbellatus</i>   | bat        | dull   | 1.34 | 1.00 | 1.34 | 145.00 | 47.37 | 22.00 | 440.64  | 63.00 | 11.50 | 52.13 | 3.47  | -6.85 | 3.78  | -3.54 |
| <i>S. vatkeanus</i>    | bat        | dull   | 1.32 | 0.53 | 0.69 | 135.00 | 43.00 | 17.00 | 845.00  | 50.00 | 15.00 | 56.00 | 3.25  | -4.99 | -1.63 | 0.50  |
| <i>C. baezanus</i>     | sicklebill | bright | 1.31 | 0.50 | 0.65 | 20.00  | 45.00 | 35.00 | 320.00  | 27.30 | 15.00 | 36.00 | -0.23 | -1.20 | -6.62 | -3.70 |
| <i>C. bangii</i>       | sicklebill | bright | 0.70 | 0.52 | 0.36 | 16.50  | 21.00 | 14.00 | 128.56  | 11.00 | 8.70  | 22.00 | -4.96 | -0.38 | -5.73 | 1.25  |
| <i>C. congestus</i>    | sicklebill | bright | 0.81 | 0.59 | 0.48 | 35.00  | 42.00 | 35.00 | 405.00  | 15.00 | 11.00 | 40.00 | -0.29 | 1.11  | -7.62 | -3.09 |
| <i>C. granulosis 1</i> | sicklebill | bright | 0.90 | 0.50 | 0.45 | 15.00  | 38.00 | 33.00 | 180.00  | 20.00 | 6.00  | 38.00 | -1.06 | 0.73  | -5.30 | -1.24 |
| <i>C. granulosis 2</i> | sicklebill | bright | 0.93 | 0.52 | 0.49 | 32.00  | 46.00 | 40.00 | 320.00  | 28.80 | 13.00 | 60.00 | 2.10  | 1.32  | -5.34 | -2.86 |
| <i>C. granulosis 3</i> | sicklebill | bright | 1.05 | 0.48 | 0.50 | 20.00  | 48.00 | 36.00 | 320.00  | 33.00 | 13.00 | 41.00 | 0.78  | 0.12  | -5.61 | -1.99 |
| <i>C. granulosis</i>   | sicklebill | bright | 1.00 | 0.45 | 0.45 | 45.00  | 44.00 | 39.00 | 500.00  | 18.00 | 10.00 | 47.00 | 1.14  | 0.66  | -5.73 | -1.73 |
| <i>C. macrophyllus</i> | sicklebill | bright | 0.53 | 0.54 | 0.29 | 30.00  | 31.00 | 16.50 | 405.00  | 17.88 | 5.00  | 29.50 | -2.62 | 0.34  | -3.45 | 2.72  |
| <i>C. panamensis</i>   | sicklebill | bright | 1.22 | 0.41 | 0.50 | 20.00  | 35.00 | 31.00 | 400.00  | 27.00 | 15.00 | 32.00 | -1.34 | -1.21 | -8.25 | -2.23 |
| <i>C. pulcher</i>      | sicklebill | bright | 1.32 | 0.36 | 0.48 | 15.00  | 46.00 | 18.00 | 320.00  | 27.00 | 11.50 | 55.00 | -0.15 | -1.17 | -8.48 | -2.95 |

|                        |            |        |      |      |      |       |       |       |        |       |      |       |       |       |        |       |
|------------------------|------------|--------|------|------|------|-------|-------|-------|--------|-------|------|-------|-------|-------|--------|-------|
| <i>C. roseus</i>       | sicklebill | bright | 0.71 | 0.43 | 0.30 | 15.00 | 42.00 | 21.00 | 245.00 | 12.00 | 5.00 | 33.00 | -2.07 | 1.07  | -7.87  | -0.38 |
| <i>C. trachyanthus</i> | sicklebill | bright | 1.00 | 0.49 | 0.49 | 12.00 | 35.50 | 28.80 | 66.27  | 17.05 | 8.50 | 46.50 | -1.61 | 0.64  | -11.12 | -4.93 |
| <i>C. umbrosus</i>     | sicklebill | bright | 0.83 | 0.56 | 0.46 | 38.33 | 39.00 | 19.33 | 300.93 | 12.00 | 5.33 | 37.00 | -1.77 | -0.18 | -4.77  | -0.39 |
| <i>C. urubambae</i>    | sicklebill | bright | 1.03 | 0.44 | 0.46 | 13.00 | 32.00 | 17.00 | 147.00 | 12.00 | 3.00 | 30.00 | -3.51 | -0.90 | -6.49  | -0.59 |
| <i>C. vargasii</i>     | sicklebill | bright | 0.63 | 0.53 | 0.33 | 25.00 | 30.00 | 15.00 | 196.00 | 24.00 | 7.00 | 32.00 | -2.83 | -0.04 | -4.96  | 1.41  |
| <i>C. yungasensis</i>  | sicklebill | bright | 0.77 | 0.46 | 0.36 | 25.00 | 26.00 | 9.00  | 48.00  | 16.00 | 5.00 | 15.00 | -5.03 | -1.31 | -5.47  | 2.21  |

**Table S2.** List of taxa and their known pollinators used as a training set in predictive linear discriminant analyses.

| Taxon                                          | Known Pollinator Class | Citation                        |
|------------------------------------------------|------------------------|---------------------------------|
| <i>Burmeistera ceratocarpa</i> LL15            | bat                    | (Muchhala 2006)                 |
| <i>Burmeistera cyclostigmata</i> LL4           | bat                    | (Muchhala 2003)                 |
| <i>Burmeistera sodiroana</i> LL77              | bat                    | (Muchhala and Jarrín-V 2002)    |
| <i>Burmeistera succulenta</i> LL210            | bat                    | (Muchhala and Jarrín-V 2002)    |
| <i>Burmeistera tenuiflora</i> LL36             | bat                    | (Muchhala 2003)                 |
| <i>Burmeistera truncata</i> LL286              | bat                    | (Muchhala and Jarrín-V 2002)    |
| <i>Centropogon brittonianus</i> LL83           | bat                    | pers. obs.                      |
| <i>Centropogon incanus</i> LL49                | bat                    | pers. obs.                      |
| <i>Siphocampylus giganteus</i> LL74            | bat                    | pers. obs.                      |
| <i>Siphocampylus umbellatus</i> LL100          | bat                    | (Sazima et al. 1994)            |
| <i>Burmeistera parviflora</i> LL20             | hummingbird            | pers. obs.                      |
| <i>Centropogon aequatorialis</i> LL63          | hummingbird            | (Muchhala and Thomson 2010)     |
| <i>Centropogon cornutus</i> LL28               | hummingbird            | (Buzato et al. 2000)            |
| <i>Centropogon costaricae</i> LL2              | hummingbird            | (Fenster 1991)                  |
| <i>Centropogon ferrugineus</i> LL1             | hummingbird            | (Tolozza-Moreno et al. 2015)    |
| <i>Centropogon ferrugineus</i> LL33            | hummingbird            | (Tolozza-Moreno et al. 2015)    |
| <i>Centropogon grandidentatus</i> LL47         | hummingbird            | (Colwell 1973)                  |
| <i>Centropogon solanifolius</i> LL200          | hummingbird            | (Muchhala and Thomson 2010)     |
| <i>Centropogon solanifolius</i> LL26           | hummingbird            | (Muchhala and Thomson 2010)     |
| <i>Centropogon talamancensis</i> LL27          | hummingbird            | (Colwell 1973)                  |
| <i>Centropogon valerii</i> 63                  | hummingbird            | (Colwell 1973)                  |
| <i>Siphocampylus betulaefolius</i> 88          | hummingbird            | (Buzato et al. 2000)            |
| <i>Siphocampylus nemoralis</i> LL116           | hummingbird            | (Galletto and Bernardello 2003) |
| <i>Siphocampylus westinianus</i> 150           | hummingbird            | (Sazima et al. 1996)            |
| <i>Centropogon baezani</i> LL64                | sicklebill             | (Stein 1987)                    |
| <i>Centropogon granulosus granulosus</i> LL161 | sicklebill             | (Stein 1987)                    |
| <i>Centropogon granulosus</i> LL130            | sicklebill             | (Stein 1987)                    |
| <i>Centropogon granulosus</i> LL234            | sicklebill             | (Stein 1987)                    |
| <i>Centropogon granulosus</i> LL5              | sicklebill             | (Stein 1987)                    |
| <i>Burmeistera almedae</i> LL42                | bat                    | pers. obs.                      |

Literature Cited for Table S2:

- Buzato, S., M. Sazima, and I. Sazima. 2000. Hummingbird-Pollinated Floras at Three Atlantic Forest Sites. *Biotropica* 32:824–841.
- Colwell, R. K. 1973. Competition and coexistence in a simple tropical community. *Am. Nat.* 107:737–760.
- Fenster, C. B. 1991. Selection on floral morphology by hummingbirds. *Biotropica* 23:98–101.
- Galletto, L., and G. Bernardello. 2003. Nectar sugar composition in angiosperms from Chaco and Patagonia (Argentina): an

- animal visitor's matter? *Plant Syst. Evol.* 238:69–86.
- Muchhala, N. 2003. Exploring the boundary between pollination syndromes: Bats and hummingbirds as pollinators of *Burmeistera cyclostigmata* and *B. tenuiflora* (Campanulaceae). *Oecologia* 134:373–380.
- Muchhala, N. 2006. The pollination biology of *Burmeistera* (Campanulaceae): Specialization and syndromes. *Am. J. Bot.* 93:1081–1089.
- Muchhala, N., and P. Jarrín-V. 2002. Flower Visitation by Bats in Cloud Forests of Western Ecuador. *Biotropica* 34:387–395.
- Muchhala, N., and J. D. Thomson. 2010. Fur versus feathers: pollen delivery by bats and hummingbirds and consequences for pollen production. *Am. Nat.* 175:717–726.
- Sazima, I., S. Buzato, and M. Sazima. 1996. An assemblage of hummingbird-pollinated flowers in a montane forest in southeastern Brazil. *Bot. Acta* 109:149–160.
- Sazima, M., I. Sazima, and S. Buzato. 1994. Nectar by day and night: *Siphocampylus sulfureus* (Lobeliaceae) pollinated by hummingbirds and bats. *Plant Syst. Evol.* 191:237–246.
- Stein, B. A. 1987. Systematics and evolution of *Centropogon* subgenus *Centropogon* (Campanulaceae-Lobelioideae). Washington University.
- Tolosa-Moreno, D. L., D. A. León-Camargo, and L. Rosero-Lasprilla. 2015. El ciclo anual de una comunidad de colibríes (Trochilidae) en bosques altoandinos intactos y paramizados en la Cordillera Oriental de Colombia. *Ornitol. Colomb.* 2014:28–47.

**Table S3.** Predictions of pollination syndrome from two linear discriminant analyses based on morphological measurements from species with known pollinators (see Table S2), using both raw morphological measurements and PC loadings from a phylogenetic PCA. Posterior probabilities of the predictions are presented for those taxa for which there is conflict between pollination syndrome based on our color criterion (see first column) and the predictive LDAs.

| Taxon                                   | Pollination syndrome (Color) | LDA prediction (morphology) | Support for conflict |
|-----------------------------------------|------------------------------|-----------------------------|----------------------|
| <i>Burmeistera racemiflora</i> _6       | bat                          | hummingbird                 | 0.7956               |
| <i>Siphocampylus rusbyanus</i> _LL52    | bat                          | bat                         | -                    |
| <i>Centropogon mandonis</i> _LL86       | hummingbird                  | bat                         | 1                    |
| <i>Siphocampylus affinis</i> _89        | bat                          | hummingbird                 | 1                    |
| <i>Siphocampylus obovatus</i> _LL173    | bat                          | hummingbird                 | 1                    |
| <i>Centropogon mandonis</i> _54         | hummingbird                  | bat                         | 1                    |
| <i>Centropogon subandinus</i> _LL71     | hummingbird                  | bat                         | 0.5211               |
| <i>Centropogon incanus</i> _pink_LL87   | hummingbird                  | bat                         | 0.9999               |
| <i>Centropogon magnificus</i> _LL107    | hummingbird                  | bat                         | 1                    |
| <i>Siphocampylus chloroleucus</i> _100  | bat                          | hummingbird                 | 1                    |
| <i>Burmeistera microphylla</i> _LL43    | bat                          | hummingbird                 | 0.9828               |
| <i>Siphocampylus ayersiae</i> _LL88     | bat                          | hummingbird                 | 0.9891               |
| <i>Centropogon diana</i> _LL195         | bat                          | hummingbird                 | 0.9976               |
| <i>Burmeistera domingensis</i> _LL81    | bat                          | hummingbird                 | 0.9997               |
| <i>Burmeistera almedae</i> _LL42        | bat                          | bat                         | -                    |
| <i>Burmeistera chiriquiensis</i> _LL132 | bat                          | bat                         | -                    |
| <i>Burmeistera crebra</i> _LL44         | bat                          | bat                         | -                    |
| <i>Burmeistera dendrophila</i> _LL122   | bat                          | bat                         | -                    |
| <i>Burmeistera mcvaughii</i> _LL123     | bat                          | bat                         | -                    |
| <i>Burmeistera morii</i> _LL126         | bat                          | bat                         | -                    |
| <i>Burmeistera obtusifolia</i> _LL32    | bat                          | bat                         | -                    |
| <i>Burmeistera refracta</i> _LL79       | bat                          | bat                         | -                    |
| <i>Burmeistera</i> _sp_LL204            | bat                          | bat                         | -                    |
| <i>Burmeistera toroensis</i> _LL29      | bat                          | bat                         | -                    |
| <i>Burmeistera utleyi</i> _LL121        | bat                          | bat                         | -                    |
| <i>Burmeistera variabilis</i> _LL211    | bat                          | bat                         | -                    |
| <i>Burmeistera vulgaris</i> _16         | bat                          | bat                         | -                    |
| <i>Burmeistera zurquiensis</i> _LL38    | bat                          | bat                         | -                    |
| <i>Centropogon argutus</i> _LL243       | hummingbird                  | hummingbird                 | -                    |
| <i>Centropogon asclepius</i> _LL61      | hummingbird                  | hummingbird                 | -                    |

|                                  |             |             |   |
|----------------------------------|-------------|-------------|---|
| Centropogon_bangii_17            | sicklebill  | sicklebill  | - |
| Centropogon cf weberbaueri LL174 | hummingbird | hummingbird | - |
| Centropogon_coccineus_LL8        | hummingbird | hummingbird | - |
| Centropogon_comosus_29           | hummingbird | hummingbird | - |
| Centropogon_congestus_LL21       | sicklebill  | sicklebill  | - |
| Centropogon_cordifolius_LL106    | hummingbird | hummingbird | - |
| Centropogon_dombeyanus_LL163     | bat         | bat         | - |
| Centropogon_eilserii_LL249       | bat         | bat         | - |
| Centropogon_erythraeus_37        | hummingbird | hummingbird | - |
| Centropogon_featherstonei_LL158  | hummingbird | hummingbird | - |
| Centropogon_glabrifilis_41       | hummingbird | hummingbird | - |
| Centropogon_guttierrezii_LL19    | hummingbird | hummingbird | - |
| Centropogon_isabellinus_LL192    | bat         | bat         | - |
| Centropogon_leucocarpus_LL127    | hummingbird | hummingbird | - |
| Centropogon_llanganatensis_LL67  | hummingbird | hummingbird | - |
| Centropogon_luteus_52            | hummingbird | hummingbird | - |
| Centropogon_luteynii_LL125       | hummingbird | hummingbird | - |
| Centropogon_macbridei_LL165      | hummingbird | hummingbird | - |
| Centropogon_macrocarpus_53       | bat         | bat         | - |
| Centropogon_macrophyllus_LL169   | sicklebill  | sicklebill  | - |
| Centropogon_minimus_LL203        | hummingbird | hummingbird | - |
| Centropogon_nervosus_LL193       | hummingbird | hummingbird | - |
| Centropogon_palmanus_LL35        | hummingbird | hummingbird | - |
| Centropogon_panamensis_LL129     | sicklebill  | sicklebill  | - |
| Centropogon_perlongus_LL194      | bat         | bat         | - |
| Centropogon_peruvianus_LL246     | bat         | bat         | - |
| Centropogon_pichinchensis_56     | hummingbird | hummingbird | - |
| Centropogon_preslii_57           | hummingbird | hummingbird | - |
| Centropogon_pulcher_LL168        | sicklebill  | sicklebill  | - |
| Centropogon_reticulatus_LL54     | hummingbird | hummingbird | - |
| Centropogon_rex_LL207            | bat         | bat         | - |
| Centropogon_roseus_LL216         | sicklebill  | sicklebill  | - |
| Centropogon_salviiformis_LL70    | hummingbird | hummingbird | - |
| Centropogon_simulans_LL248       | bat         | bat         | - |
| Centropogon_smithii_LL6          | bat         | bat         | - |
| Centropogon_sodiroanus_LL72      | hummingbird | hummingbird | - |
| Centropogon_sp_LL238             | hummingbird | hummingbird | - |
| Centropogon_sp_nov_LL176         | bat         | bat         | - |
| Centropogon_tesmannii_LL73       | hummingbird | hummingbird | - |

|                                     |             |             |   |
|-------------------------------------|-------------|-------------|---|
| Centropogon_trachyanthus_LL75       | sicklebill  | sicklebill  | - |
| Centropogon_trichoides_62           | hummingbird | hummingbird | - |
| Centropogon_umbrosus_LL172          | sicklebill  | sicklebill  | - |
| Centropogon_unduavensis_LL108       | hummingbird | hummingbird | - |
| Centropogon_urubambae_LL171         | sicklebill  | sicklebill  | - |
| Centropogon_vargasii_LL244          | sicklebill  | sicklebill  | - |
| Centropogon_viridiflorus_LL180      | bat         | bat         | - |
| Centropogon_weberbaueri_LL157       | hummingbird | hummingbird | - |
| Centropogon_yarumalensis_LL202      | hummingbird | hummingbird | - |
| Centropogon_yungasensis_LL188       | sicklebill  | sicklebill  | - |
| Siphocampylus_actinothrix_LL190     | bat         | bat         | - |
| Siphocampylus_aff_rictus_LL166      | bat         | bat         | - |
| Siphocampylus_andinus_LL94          | hummingbird | hummingbird | - |
| Siphocampylus_angustiflorus_LL196   | hummingbird | hummingbird | - |
| Siphocampylus_antioquianus_LL197    | hummingbird | hummingbird | - |
| Siphocampylus_aureus_LL111          | hummingbird | hummingbird | - |
| Siphocampylus_bilabiatu_LL51        | hummingbird | hummingbird | - |
| Siphocampylus_boliviensis_LL90      | hummingbird | hummingbird | - |
| Siphocampylus_brevicalyx_LL76       | hummingbird | hummingbird | - |
| Siphocampylus_citrinus_LL179        | hummingbird | hummingbird | - |
| Siphocampylus_clotho_LL245          | hummingbird | hummingbird | - |
| Siphocampylus_convolvulaceus_101    | hummingbird | hummingbird | - |
| Siphocampylus_correoides_103        | hummingbird | hummingbird | - |
| Siphocampylus_corymbiferus_106      | hummingbird | hummingbird | - |
| Siphocampylus_corymbiferus_LL91     | hummingbird | hummingbird | - |
| Siphocampylus_corynoides_LL175      | bat         | bat         | - |
| Siphocampylus_dependens_LL156       | hummingbird | hummingbird | - |
| Siphocampylus_elfredii_LL185        | hummingbird | hummingbird | - |
| Siphocampylus_fiebrigii_LL113       | hummingbird | hummingbird | - |
| Siphocampylus_flagelliformis_LL92   | hummingbird | hummingbird | - |
| Siphocampylus_fulgens_112           | hummingbird | hummingbird | - |
| Siphocampylus_jelksii_LL159         | bat         | bat         | - |
| Siphocampylus_krauseanus_LL250      | hummingbird | hummingbird | - |
| Siphocampylus_longipedunculatus_121 | hummingbird | hummingbird | - |
| Siphocampylus_lycioides_122         | hummingbird | hummingbird | - |
| Siphocampylus_macropodus_123        | hummingbird | hummingbird | - |
| Siphocampylus_matthiaei_LL155       | bat         | bat         | - |
| Siphocampylus_nematosepalus_LL30    | hummingbird | hummingbird | - |
| Siphocampylus_nitidus_126           | hummingbird | hummingbird | - |



|                                      |             |             |   |
|--------------------------------------|-------------|-------------|---|
| Siphocampylus_oblongifolius_LL114    | hummingbird | hummingbird | - |
| Siphocampylus_orbignianus_LL93       | hummingbird | hummingbird | - |
| Siphocampylus_pubescens_LL223        | hummingbird | hummingbird | - |
| Siphocampylus_rosemarinifolius_LL162 | hummingbird | hummingbird | - |
| Siphocampylus_scandens_131           | hummingbird | hummingbird | - |
| Siphocampylus_sceptrum_132           | hummingbird | hummingbird | - |
| Siphocampylus_smilax_LL95            | bat         | bat         | - |
| Siphocampylus_sp_LL164               | hummingbird | hummingbird | - |
| Siphocampylus_sp_nov_LL189           | hummingbird | hummingbird | - |
| Siphocampylus_sp_nov1_LL102          | hummingbird | hummingbird | - |
| Siphocampylus_sparsipilus_LL96       | hummingbird | hummingbird | - |
| Siphocampylus_tunarensis_LL97        | bat         | bat         | - |
| Siphocampylus_tupaiformis_144        | hummingbird | hummingbird | - |
| Siphocampylus_vatkeanus_LL119        | bat         | bat         | - |
| Siphocampylus_virgatus_LL167         | hummingbird | hummingbird | - |
| Siphocampylus_werdermannii_LL101     | hummingbird | hummingbird | - |

**Table S4. Inferred mean number of transitions between pollination syndromes in the centropogonid.** Values calculated from Bayesian stochastic character mapping on a random subset of 100 trees from the BEAST posterior distribution, performed using an “ARD” model with the make.simmap function in the phytools package. Sicklebills are a subset of hummingbirds in the genus *Eutoxeres*.

| <b>Ancestor</b>             | <b>Descendant</b>           | <b>Mean</b> |
|-----------------------------|-----------------------------|-------------|
| Straight-billed hummingbird | Bat                         | 16.43       |
| Straight-billed hummingbird | Sicklebill hummingbird      | 1.18        |
| Bat                         | Straight-billed hummingbird | 13.94       |
| Bat                         | Sicklebill                  | 0           |
| Sicklebill hummingbird      | Straight-billed hummingbird | 2.85        |
| Sicklebill hummingbird      | Bat                         | 0           |

**Table S5. Estimates of functional trait optima (mean theta values) and their standard errors for species with different pollination syndromes from OUwie analysis. Values in given in units of mm (L), mm<sup>2</sup> (area), or mm<sup>3</sup>, except for ratios, which are unitless.**

| Trait         | Theta (Straight-bill) | SE (Straight-bill) | Theta (Sicklebill) | SE (Sicklebill) | Theta (Bat) | SE (Bat) |
|---------------|-----------------------|--------------------|--------------------|-----------------|-------------|----------|
| Ratio_BotMid  | 0.59                  | 0.06               | 0.59               | 0.06            | 1.68        | 0.09     |
| Ratio_MidTop  | 0.87                  | 0.02               | 0.48               | 0.05            | 0.52        | 0.03     |
| Ratio_BotTop  | 0.48                  | 0.02               | 0.47               | 0.04            | 0.75        | 0.03     |
| Peduncule     | 52.21                 | 4.33               | 26.73              | 10.61           | 91.04       | 5.44     |
| L_corolla     | 41.13                 | 1.62               | 38.96              | 3.25            | 35.78       | 2.31     |
| L_corollaTube | 30.36                 | 1.05               | 26.82              | 2.77            | 18.33       | 1.34     |
| Vol_ovary     | 290.63                | 138.12             | 286.65             | 193.88          | 1040.82     | 221.31   |
| Area_anther   | 18.65                 | 2.19               | 18.8               | 2.71            | 46.16       | 3.13     |
| L_stamen      | 43.13                 | 1.57               | 38.98              | 3.62            | 38.39       | 2.02     |
| Curvature     | 1                     | 0                  | 0.9                | 0               | 1           | 0        |
| PC1           | 0.06                  | 0.52               | -0.35              | 0.93            | 0.41        | 0.7      |
| PC2           | 1.23                  | 0.23               | 0.56               | 0.54            | -5.87       | 0.31     |
| PC3           | 0.49                  | 0.24               | -6.45              | 0.56            | -1.94       | 0.32     |
| PC4           | 0.16                  | 0.22               | -0.69              | 0.63            | 0.2         | 0.27     |
